# Supplementary material for: A novel sample preparation method for ultra-high vacuum (UHV) secondary ion mass spectrometry (SIMS) analysis
Source: Royal Society of Chemistry journal article supplement (doi:10.1039/c8ja00087e), 2018-01-01
Supplement: c8ja00087e1.xlsx [file c8ja00087e1.xlsx]

## Sheet: water-poor olivine sample
		18O/16O		16O/Coeff		16O1H/16O			16O1H/16O			δ 18O		δ 18O
Sample Name		H1/L'2		L'2		EM/L'2			average	std			2SE	average	std
16MF-10@01		0.00202534	0.0114978	1103338000	0.0416983	3.84796e-06	0.281876		3.39219e-06	3.14555e-07		10.0429	0.229955	10.0957	0.128081
16MF-10@2		0.00202586	0.0143798	1087304000	0.0574532	3.19136e-06	0.190112					10.3047	0.287597
16MF-10@3		0.00202573	0.0162429	1087404000	0.101109	3.36522e-06	0.24283					10.2409	0.324859
16MF-10@4		0.00202555	0.0121353	1088953000	0.10856	3.29219e-06	0.237074					10.1476	0.242706
16MF-10@5		0.00202532	0.0143861	1102833000	0.07713	3.49312e-06	0.212137					10.0344	0.287722
16MF-10@6		0.00202566	0.0114418	1108374000	0.0402237	3.43228e-06	0.329983					10.203	0.228836
16MF-10@7		0.00202531	0.014195	1110661000	0.025552	3.06613e-06	0.150633					10.0289	0.2839
16MF-10@8		0.00202508	0.0129776	1102201000	0.098305	2.90451e-06	0.16972					9.91323	0.259551
16MF-10@9		0.00202513	0.0146583	1080737000	0.0733328	3.91696e-06	0.045026					9.93966	0.293165
16MF-10@10		0.00202545	0.0153984	1081495000	0.0360679	3.4122e-06	0.064968					10.1012	0.307969
		18O/16O		16O/Coeff		16O1H/16O			16O1H/16O			δ 18O		δ 18O
Sample Name		H1/L'2		L'2		EM/L'2			average	std			2SE	average	std
16MF-56@01		0.00202515	0.0143643	1064557000	0.0530941	2.44978e-06	0.248333		2.45574e-06	2.29901e-07		9.95113	0.287287	10.1094	0.150803
16MF-56@2		0.00202578	0.0126045	1076857000	0.1059	2.67323e-06	0.226853					10.2658	0.252089
16MF-56@3		0.00202564	0.0155751	1076176000	0.101135	2.28345e-06	0.285201					10.193	0.311503
16MF-56@4		0.00202526	0.012055	1074373000	0.0952978	2.38743e-06	0.301972					10.005	0.2411
16MF-56@5		0.00202576	0.0148025	1078301000	0.0480769	2.39909e-06	0.254432					10.2538	0.296051
16MF-56@6		0.00202592	0.0150584	1067336000	0.051875	2.72281e-06	0.28662					10.3336	0.301168
16MF-56@7		0.00202512	0.0144118	1094549000	0.154736	2.26383e-06	0.294426					9.93517	0.288236
16MF-56@8		0.00202533	0.0131093	1068056000	0.112206	2.25372e-06	0.221693					10.0404	0.262186
16MF-56@9		0.00202514	0.0137153	1101596000	0.0725266	2.89313e-06	0.243479					9.94464	0.274306
16MF-56@10		0.0020256	0.0142843	1121669000	0.0458329	2.23097e-06	0.197117					10.1716	0.285685
		18O/16O		16O/Coeff		16O1H/16O			16O1H/16O			δ 18O		δ 18O
Sample Name		H1/L'2		L'2		EM/L'2			average	std			2SE	average	std
16MF-111@01		0.00202505	0.0121319	1101101000	0.0273664	2.78543e-06	0.196885		2.47502e-06	2.43047e-07		9.89926	0.242638	9.8094	0.141606
16MF-111@2		0.002025	0.0149004	1096188000	0.107295	2.80835e-06	0.265165					9.87632	0.298009
16MF-111@3		0.00202518	0.0133543	1104336000	0.120582	2.20454e-06	0.223486					9.9626	0.267086
16MF-111@4		0.00202515	0.0123478	1103291000	0.0309653	2.27556e-06	0.22544					9.94714	0.246955
16MF-111@5		0.00202465	0.0103982	1087687000	0.0191314	2.44714e-06	0.218948					9.70028	0.207963
16MF-111@6		0.00202488	0.0148635	1089883000	0.0692611	2.83183e-06	0.227046					9.81348	0.29727
16MF-111@7		0.00202473	0.0141748	1086377000	0.114945	2.25441e-06	0.231663					9.73918	0.283497
16MF-111@8		0.00202443	0.0134256	1085017000	0.0416829	2.45192e-06	0.227409					9.58857	0.268512
16MF-111@9		0.00202447	0.0115919	1090825000	0.0198342	2.35983e-06	0.247744					9.61251	0.231838
16MF-111@10		0.00202516	0.0151519	1074873000	0.0490357	2.3312e-06	0.188124					9.95462	0.303038
		18O/16O		16O/Coeff		16O1H/16O			16O1H/16O			δ 18O		δ 18O
Sample Name		H1/L'2		L'2		EM/L'2			average	std			2SE	average	std
16MF-115@01		0.00202548	0.0146311	1088131000	0.0964738	2.60084e-06	0.212424		2.55622e-06	2.25458e-07		10.1142	0.292623	9.98205	0.130084
16MF-115@2		0.00202545	0.0129374	1069606000	0.0808254	2.32808e-06	0.22381					10.1002	0.258747
16MF-115@3		0.00202547	0.0136522	1069771000	0.0250298	2.25905e-06	0.229882					10.1097	0.273044
16MF-115@4		0.002025	0.0138192	1088119000	0.389928	2.91354e-06	0.29597					9.87283	0.276385
16MF-115@5		0.00202531	0.0146605	1056255000	0.0836056	2.81124e-06	0.231425					10.0309	0.293211
16MF-115@6		0.002025	0.0129587	1059949000	0.0798891	2.31416e-06	0.261192					9.87283	0.259174
16MF-115@7		0.00202518	0.0148625	1050876000	0.0299074	2.65045e-06	0.229405					9.96559	0.297249
16MF-115@8		0.00202486	0.0146964	1039210000	0.0171535	2.4799e-06	0.251579					9.80451	0.293928
16MF-115@9		0.0020249	0.014782	1043588000	0.058478	2.45272e-06	0.279892					9.82246	0.29564
16MF-115@10		0.00202551	0.0142988	1030310000	0.0380547	2.75221e-06	0.102033					10.1272	0.285976
		18O/16O		16O/Coeff		16O1H/16O			16O1H/16O			δ 18O		δ 18O
Sample Name		H1/L'2		L'2		EM/L'2			average	std			2SE	average	std
16MF-116@01		0.00202501	0.0149111	1012788000	0.0578145	2.8016e-06	0.298514		3.11818e-06	2.99962e-07		9.87981	0.298221	9.74107	0.149799
16MF-116@2		0.00202518	0.0142092	999556600	0.0277599	3.00236e-06	0.264248					9.96409	0.284184
16MF-116@3		0.00202469	0.0147633	1000898000	0.0203728	2.77118e-06	0.272057					9.71873	0.295267
16MF-116@4		0.00202449	0.0149442	977067600	0.0658377	2.98899e-06	0.208885					9.61849	0.298885
16MF-116@5		0.00202443	0.012466	985169600	0.118935	2.97246e-06	0.21852					9.58957	0.24932
16MF-116@6		0.0020245	0.0146186	974144400	0.0278926	3.82003e-06	0.218264					9.62647	0.292373
16MF-116@7		0.00202471	0.0141988	964771900	0.0216865	3.27242e-06	0.261403					9.72821	0.283976
16MF-116@8		0.00202455	0.0124541	952798200	0.0367209	3.25215e-06	0.265259					9.65141	0.249082
16MF-116@9		0.00202453	0.013267	940971800	0.0605986	3.177e-06	0.250899					9.64143	0.26534
16MF-116@10		0.00202524	0.0135657	943071700	0.0936208	3.12366e-06	0.208097					9.99252	0.271315
		18O/16O		16O/Coeff		16O1H/16O			16O1H/16O			δ 18O		δ 18O
Sample Name		H1/L'2		L'2		EM/L'2			average	std			2SE	average	std
16MF-119@01		0.00202545	0.0144248	932501800	0.058861	3.4246e-06	0.204464		3.26867e-06	2.86163e-07		10.1012	0.288496	9.90176	0.138353
16MF-119@2		0.00202524	0.0146869	928965900	0.0184309	3.45448e-06	0.204512					9.99352	0.293738
16MF-119@3		0.00202476	0.0148104	894350500	0.0756886	3.60001e-06	0.234835					9.75314	0.296207
16MF-119@4		0.0020251	0.0139971	921845500	0.0988212	3.12264e-06	0.210412					9.9222	0.279943
16MF-119@5		0.00202473	0.0146811	915678400	0.0496543	2.82068e-06	0.226558					9.74067	0.293621
16MF-119@6		0.00202551	0.0122252	907136700	0.0149499	3.20714e-06	0.282378					10.1272	0.244504
16MF-119@7		0.00202504	0.013548	912716400	0.011615	3.72357e-06	0.28708					9.89378	0.27096
16MF-119@8		0.00202479	0.00999782	876903000	0.0734844	3.26709e-06	0.180821					9.7706	0.199956
16MF-119@9		0.00202488	0.0148898	880267000	0.114271	3.14462e-06	0.212042					9.81498	0.297797
16MF-119@10		0.00202505	0.0136644	905623100	0.04737	2.92191e-06	0.295318					9.90026	0.273289
		18O/16O		16O/Coeff		16O1H/16O			16O1H/16O			δ 18O		δ 18O
Sample Name		H1/L'2		L'2		EM/L'2			average	std			2SE	average	std
16MF-129@01		0.00202764	0.0145988	872273300	0.100456	2.78981e-06	0.244792		2.92012e-06	1.47895e-07		11.1904	0.291977	11.0089	0.148237
16MF-129@2		0.00202723	0.013599	862632400	0.0910651	2.85087e-06	0.233079					10.9864	0.271979
16MF-129@3		0.00202702	0.0141795	881648700	0.378654	2.6981e-06	0.232288					10.8792	0.283591
16MF-129@4		0.00202688	0.0139132	866425100	0.0502494	2.97687e-06	0.271283					10.8094	0.278263
16MF-129@5		0.0020274	0.0145092	862480000	0.11061	3.03674e-06	0.23462					11.0722	0.290185
16MF-129@6		0.00202712	0.0142407	859111100	0.0915724	3.22869e-06	0.281049					10.9316	0.284814
16MF-129@7		0.00202769	0.0140771	870326700	0.0615557	2.88537e-06	0.231166					11.2168	0.281541
16MF-129@8		0.00202763	0.0149029	868521900	0.0349769	2.93572e-06	0.252537					11.1879	0.298057
16MF-129@9		0.00202701	0.0140708	876293900	0.0531554	2.97515e-06	0.252437					10.8772	0.281417
16MF-129@10		0.00202713	0.0139685	884798700	0.097335	2.82384e-06	0.238027					10.9376	0.279369
		18O/16O		16O/Coeff		16O1H/16O			16O1H/16O			δ 18O		δ 18O
Sample Name		H1/L'2		L'2		EM/L'2			average	std			2SE	average	std
16MF-130@01		0.0020256	0.015001	879116000	0.0857769	2.53072e-06	0.214549		2.7141e-06	2.55786e-07		10.1721	0.300019	10.1474	0.128521
16MF-130@2		0.00202516	0.0139926	878667200	0.04558	2.65604e-06	2.23345					9.95611	0.279852
16MF-130@3		0.00202549	0.0129125	888232600	0.0171877	2.32273e-06	0.230215					10.1182	0.258249
16MF-130@4		0.00202545	0.0146218	868046300	0.099921	2.82097e-06	0.230098					10.0967	0.292436
16MF-130@5		0.00202574	0.014036	862810200	0.0887384	3.04819e-06	0.209521					10.2414	0.28072
16MF-130@6		0.00202607	0.0136256	861885500	0.0554455	2.94183e-06	0.263767					10.4094	0.272512
16MF-130@7		0.00202565	0.0141249	874431800	0.0757112	2.90409e-06	0.223979					10.2	0.282499
16MF-130@8		0.00202537	0.0148704	878061600	0.0402663	2.97302e-06	0.276755					10.0593	0.297408
16MF-130@9		0.00202529	0.0148974	875766900	0.0972969	2.51126e-06	0.10731					10.0175	0.297948
16MF-130@10		0.00202566	0.0149303	868447100	0.0966534	2.43216e-06	0.294226					10.2035	0.298607
